# Supplementary material for: The Zero Regrets Algorithm: Optimizing over Pure Nash Equilibria via Integer Programming
Source: Atypon-hosted journal article supplement (doi:10.1287/ijoc.2022.0282), 2023-05-19
Supplement: ijoc.2022.0282.sm1.pdf [file ijoc.2022.0282.sm1.pdf]

## Online Supplement

### KPG Complexity Proof

We perform a reduction from the *DeNegre Bilevel Knapsack Problem (BKP)* below, which is  $\Sigma_2^p$ -complete (Caprara et al. 2014).

**Definition 1 (BKP).** *Given two  $m$ -dimensional non-negative integer vectors  $a$  and  $b$  and two non-negative integers  $A$  and  $B$ , the BKP asks whether there exists a binary vector  $x$  – with  $\sum_{j=1}^m a_j x_j \leq A$  – satisfying  $\sum_{j=1}^m b_j y_j (1 - x_j) \leq B - 1$  for any binary vector  $y$  such that  $\sum_{j=1}^m b_j y_j \leq B$ .*

Without loss of generality, we assume  $a_j \leq A$  for any  $j$ . If this is not the case, we can always modify the original BKP instance as follows: (i.) we replace  $A$  with  $2A + 1$ , any  $a_j \leq A$  with  $2a_j$ , and any  $a_j > A$  with  $(2A + 1)$ , and (ii.) we add a new element  $m + 1$  (i.e., a new item), with  $a_{m+1} = 1$  and  $b_{m+1} = B$ . In any solution of this modified instance, we must have  $x_{m+1} = 1$ , otherwise  $\sum_{j=1}^{m+1} b_j y_j (1 - x_j) \leq B - 1$  would never hold since  $\sum_{j=1}^{m+1} b_j y_j (1 - x_j) = B$  when  $x_{m+1} = 0$  and  $y_{m+1} = 1$ . Setting  $x_{m+1} = 1$  gives a residual capacity  $2A$  for the packing constraint of  $x$ . Indeed, every subset of  $x$  variables with original  $a_j \leq A$  that was satisfying  $\sum_{j=1}^m a_j x_j \leq A$  now satisfies  $\sum_{j=1}^m 2a_j x_j \leq 2A$ . On the contrary, we cannot select any  $x_j$  variable with original  $a_j > A$ . Thus, a solution (if any) to the original instance corresponds to a solution to the modified instance, and vice versa.

Proof of Theorem 2. First, deciding if KPG admits a PNE is in  $\Sigma_2^p$ , as we ask whether there exists a strategy profile where every player cannot improve its payoff with any of its strategies, and we can compute the payoff of such strategies in polynomial time. Given a BKP instance, we construct a KPG instance with 2 players as follows. We consider  $m + 1$  items and associate the elements of vectors  $x$  and  $y$  with the first  $m$  elements of vectors  $x^1$  and  $x^2$ , respectively. Then, player 1 solves the problem in (1), whereas player 2 solves the problem in (2).

$$\max_{x^1} \left\{ \sum_{j=1}^m b_j x_j^1 x_j^2 + x_{m+1}^1 x_{m+1}^2 : \sum_{j=1}^m a_j x_j^1 \leq A, x^1 \in \{0, 1\}^{m+1} \right\}. \quad (1)$$

$$\begin{aligned} \max_{x^2} \{ & (B - 1)x_{m+1}^2 + \sum_{j=1}^m b_j x_j^2 - \sum_{j=1}^m b_j x_j^2 x_j^1 : \\ & \sum_{j=1}^m b_j x_j^2 + Bx_{m+1}^2 \leq B, x^2 \in \{0, 1\}^{m+1} \}. \end{aligned} \quad (2)$$

In order to prove the theorem, we show that the *KPG* instance has a *PNE* if and only if the corresponding *BKP* instance admits a solution.

*BKP admits a solution.* We assume the *BKP* instance has a solution  $\bar{x}$ . We prove that  $\hat{x}^1 = (\bar{x}, 1)$ ,  $\hat{x}^2 = (\bar{0}, 1)$  (with  $\bar{0}$  being an  $m$ -dimensional vector of zeros) is a *PNE*. First, both the strategies  $\hat{x}^1$  and  $\hat{x}^2$  are feasible by construction. Given  $\hat{x}^2$ , player 1 attains the maximum payoff of 1 by playing strategy  $\hat{x}^1$ . The strategy  $\hat{x}^2$  yields a payoff of  $B - 1$  for player 2 when player 1 plays  $\hat{x}^1$ . Player 2 cannot profitably deviate by setting  $x_{m+1}^2 = 0$ . This follows from the fact that the *BKP* instance has a solution  $\bar{x}$  and, given that  $\hat{x}_j^1 = \bar{x}_j$  for  $j = 1, \dots, m$ , the following inequality must hold.

$$\sum_{j=1}^m b_j x_j^2 - \sum_{j=1}^m b_j x_j^2 \hat{x}_j^1 \leq B - 1.$$

Thus, the pair of strategies  $(\hat{x}^1, \hat{x}^2)$  is also a *PNE* for the *KPG* instance.

*BKP has no solution.* If the *BKP* instance has no solution, player 2 never plays  $x_{m+1}^2 = 1$  in a best-response, as it can always obtain a payoff of  $B$  with variables  $x_1^2, \dots, x_m^2$  for any player 1's feasible strategy. Consider any player 2's best-response  $\hat{x}^2$ , with  $\hat{x}_{m+1}^2 = 0$ , and assume the *KPG* instance has a *PNE*  $(\hat{x}^1, \hat{x}^2)$ . Then, in the player 1's best-response  $\hat{x}^1$ , there exists at least one  $\hat{x}_j^1 = 1$  when  $\hat{x}_j^2 = 1$  and  $b_j > 0$  (since  $a_j \leq A$  for any  $j$ ). However, in this case, player 2 would deviate from  $\hat{x}^2$ , since  $\hat{x}^2$  gives a payoff  $< B$  under  $\hat{x}^1$ . Thus, no *PNE* exists in the *KPG* instance.  $\square$

## Potential *KPG*

Proof of Theorem 3. To prove our result, we first consider the case where  $c^i > 0$  for each player  $i$ . Let the function  $\phi(x^1, \dots, x^n) : \prod_{i=1}^n \mathcal{X}^i \rightarrow \mathbb{R}$  be such that

$$\phi(x^1, \dots, x^n) = \sum_{i=1}^n \frac{1}{c^i} \left( \sum_{j=1}^m p_j^i x_j^i \right) + \sum_{l=1}^{n-1} \sum_{k=l+1}^n \Gamma(x^l, x^k), \quad (3)$$

where  $\Gamma(x^l, x^k) = \sum_{j=1}^m x_j^l x_j^k$  is the number of items selected by both player  $l$  and player  $k$  in their strategies  $x^l$  and  $x^k$ . We prove that  $\phi$  is a potential function by showing that, given two strategies  $\bar{x}^i$  and  $\hat{x}^i$  of any player  $i$  and any given strategies  $x^{-i}$  of the other players, we have  $\phi(\bar{x}^i, x^{-i}) - \phi(\hat{x}^i, x^{-i}) > 0$  if and only if  $u^i(\bar{x}^i, x^{-i}) - u^i(\hat{x}^i, x^{-i}) > 0$ . Given the definition of  $\phi$ , we have that

$$\phi(\bar{x}^i, x^{-i}) - \phi(\hat{x}^i, x^{-i}) = \frac{1}{c^i} \sum_{j=1}^m p_j^i \bar{x}_j^i + \sum_{l=1}^{i-1} \Gamma(x^l, \bar{x}^i) + \sum_{k=i+1}^n \Gamma(\bar{x}^i, x^k)$$

$$\begin{aligned}
 & -\frac{1}{c^i} \sum_{j=1}^m p_j^i \hat{x}_j^i - \sum_{l=1}^{i-1} \Gamma(x^l, \hat{x}^i) - \sum_{k=i+1}^n \Gamma(\hat{x}^i, x^k) \\
 & = \frac{1}{c^i} \left( \sum_{j=1}^m p_j^i \bar{x}_j^i + c^i \sum_{l=1}^{i-1} \Gamma(x^l, \bar{x}^i) + c^i \sum_{k=i+1}^n \Gamma(\bar{x}^i, x^k) \right) \\
 & - \frac{1}{c^i} \left( \sum_{j=1}^m p_j^i \hat{x}_j^i + c^i \sum_{l=1}^{i-1} \Gamma(x^l, \hat{x}^i) + c^i \sum_{k=i+1}^n \Gamma(\hat{x}^i, x^k) \right) \\
 & = \frac{1}{c^i} (u^i(\bar{x}^i, x^{-i}) - u^i(\hat{x}^i, x^{-i})).
 \end{aligned}$$

It follows that  $\phi$  is a potential function for the *KPG*. On the other hand, if  $c^i < 0$  for each player  $i$ , by similar arguments, we can show that  $-\phi$  is a potential function.  $\square$

## Extended Computational Results

In the following sections, we report the full results of our computational tests. The columns are similar to the ones reported in the previous tables, possibly with the following additions (i.) *#It* indicating the number of iterations of our algorithm, and (ii.) *PNE \** reporting the social welfare of the most efficient *PNE*, (iii.) *PNE °* reporting the social welfare of the less efficient *PNE* (if computed), (iv.) *OSW* reporting the optimal social welfare in the game, and (v.) *Bound* reporting the last proven bound on  $\mathcal{Q}$  before the latter becomes infeasible (or the algorithm hits the time limit), irrespective on whether the algorithm enumerated *PNEa* or not.

### Full *KPG* Results

We report the two tables with the full *KPG* results. In the first column of [Tables 1](#) and [2](#) we add the field  $I$  to specify the instance type. Specifically, the knapsack capacity of player  $i$  is given by  $\sum_{j=1}^m (w_j^i)I/10$ .

| $(n, m, d, I)$ | <i>PoS</i> | #EI  | #EI.P | #EI.D | #It | Time    | Time-1 <sup>st</sup> | <i>PNE</i> * | <i>OSW</i> | Bound |
|----------------|------------|------|-------|-------|-----|---------|----------------------|--------------|------------|-------|
| (2, 25, A, 2)  | 1.106      | 12   | 0     | 8     | 3   | 0.036   | 0.035                | 1884         | 2084       | 1884  |
| (2, 25, A, 5)  | 1.025      | 20   | 0     | 0     | 3   | 0.095   | 0.093                | 3086         | 3163       | 3086  |
| (2, 25, A, 8)  | 1.000      | 12   | 0     | 1     | 2   | 0.035   | 0.032                | 4883         | 4883       | 4883  |
| (2, 25, B, 2)  | 1.021      | 14   | 0     | 0     | 3   | 0.067   | 0.065                | 1609         | 1643       | 1609  |
| (2, 25, B, 5)  | 1.025      | 28   | 0     | 4     | 4   | 0.250   | 0.182                | 3456         | 3542       | 3459  |
| (2, 25, B, 8)  | -          | 10   | 0     | 7     | 2   | 0.038   | 0.035                | 4624         | 4624       | 4624  |
| (2, 25, C, 2)  | -          | 16   | 7     | 5     | 4   | 0.153   | -                    | -            | 1480       | 1329  |
| (2, 25, C, 5)  | -          | 62   | 12    | 17    | 11  | 0.967   | -                    | -            | 2083       | 1863  |
| (2, 25, C, 8)  | 1.064      | 10   | 10    | 1     | 4   | 0.037   | 0.036                | 2739         | 2914       | 2739  |
| (2, 50, A, 2)  | 1.024      | 24   | 0     | 3     | 4   | 0.213   | 0.208                | 3824         | 3914       | 3824  |
| (2, 50, A, 5)  | 1.035      | 16   | 0     | 2     | 3   | 0.214   | 0.212                | 6404         | 6626       | 6404  |
| (2, 50, A, 8)  | 1.016      | 20   | 0     | 3     | 4   | 0.205   | 0.204                | 6703         | 6809       | 6703  |
| (2, 50, B, 2)  | 1.004      | 10   | 0     | 0     | 2   | 0.043   | 0.040                | 3930         | 3946       | 3930  |
| (2, 50, B, 5)  | 1.004      | 42   | 0     | 34    | 5   | 0.853   | 0.620                | 6931         | 6962       | 6936  |
| (2, 50, B, 8)  | 1.008      | 28   | 0     | 25    | 6   | 0.620   | 0.501                | 9294         | 9372       | 9294  |
| (2, 50, C, 2)  | 1.018      | 8    | 25    | 0     | 3   | 0.087   | 0.086                | 3173         | 3230       | 3173  |
| (2, 50, C, 5)  | -          | 112  | 25    | 22    | 17  | 17.190  | -                    | -            | 5654       | 4923  |
| (2, 50, C, 8)  | 1.134      | 98   | 31    | 12    | 18  | 1.749   | 1.747                | 5358         | 6074       | 5358  |
| (2, 75, A, 2)  | 1.008      | 36   | 0     | 19    | 4   | 0.407   | 0.401                | 5784         | 5831       | 5784  |
| (2, 75, A, 5)  | 1.004      | 40   | 0     | 49    | 4   | 1.025   | 0.572                | 12701        | 12757      | 12702 |
| (2, 75, A, 8)  | 1.001      | 38   | 0     | 25    | 3   | 0.359   | 0.342                | 16319        | 16337      | 16319 |
| (2, 75, B, 2)  | 1.033      | 122  | 0     | 41    | 12  | 12.483  | 9.045                | 5690         | 5880       | 5694  |
| (2, 75, B, 5)  | 1.015      | 72   | 0     | 35    | 8   | 5.865   | 1.420                | 10293        | 10449      | 10297 |
| (2, 75, B, 8)  | 1.010      | 108  | 0     | 26    | 12  | 6.691   | 6.664                | 13769        | 13910      | 13769 |
| (2, 75, C, 2)  | 1.061      | 94   | 43    | 57    | 9   | 3.072   | 3.064                | 4356         | 4623       | 4356  |
| (2, 75, C, 5)  | -          | 136  | 35    | 87    | 18  | 134.899 | -                    | -            | 7908       | 6934  |
| (2, 75, C, 8)  | 1.089      | 108  | 37    | 57    | 18  | 5.289   | 4.865                | 8455         | 9207       | 8467  |
| (2, 100, A, 2) | 1.007      | 38   | 0     | 29    | 5   | 1.409   | 1.153                | 8302         | 8357       | 8313  |
| (2, 100, A, 5) | 1.002      | 20   | 0     | 4     | 2   | 0.355   | 0.188                | 18271        | 18301      | 18274 |
| (2, 100, A, 8) | 1.011      | 18   | 0     | 11    | 3   | 0.521   | 0.398                | 18516        | 18723      | 18519 |
| (2, 100, B, 2) | 1.018      | 78   | 0     | 11    | 8   | 4.294   | 4.281                | 8156         | 8303       | 8156  |
| (2, 100, B, 5) | 1.010      | 500  | 0     | 203   | 42  | 655.957 | 425.088              | 14246        | 14390      | 14248 |
| (2, 100, B, 8) | 1.002      | 38   | 0     | 25    | 5   | 0.997   | 0.988                | 19054        | 19084      | 19054 |
| (2, 100, C, 2) | 1.048      | 116  | 49    | 33    | 13  | 15.873  | 11.332               | 5808         | 6084       | 5817  |
| (2, 100, C, 5) | -          | 464  | 53    | 260   | 30  | tl      | -                    | -            | 9611       | 8958  |
| (2, 100, C, 8) | -          | 1512 | 64    | 66    | 110 | tl      | -                    | -            | 9791       | 9007  |

Table 1 Full results for the KPG with  $n = 2$ .

| $(n, m, d, I)$ | <i>PoS</i> | #EI | #EI.P | #EI.D | #It | Time     | Time-1 <sup>st</sup> | <i>PNE</i> * | <i>OSW</i> | Bound |
|----------------|------------|-----|-------|-------|-----|----------|----------------------|--------------|------------|-------|
| (3, 25, A, 2)  | 1.010      | 21  | 0     | 0     | 3   | 0.166    | 0.164                | 3738         | 3777       | 3738  |
| (3, 25, A, 5)  | 1.004      | 30  | 0     | 0     | 2   | 0.151    | 0.144                | 5480         | 5500       | 5480  |
| (3, 25, A, 8)  | 1.011      | 42  | 0     | 28    | 3   | 0.323    | 0.316                | 9592         | 9693       | 9592  |
| (3, 25, B, 2)  | 1.034      | 27  | 0     | 3     | 3   | 0.223    | 0.219                | 4535         | 4691       | 4535  |
| (3, 25, B, 5)  | 1.005      | 45  | 0     | 18    | 3   | 0.394    | 0.388                | 7293         | 7329       | 7293  |
| (3, 25, B, 8)  | 1.008      | 60  | 0     | 23    | 4   | 0.387    | 0.378                | 10346        | 10433      | 10346 |
| (3, 25, C, 2)  | 1.259      | 78  | 6     | 5     | 8   | 6.765    | 5.643                | 2152         | 2710       | 2165  |
| (3, 25, C, 5)  | -          | 159 | 24    | 64    | 13  | 82.115   | -                    | -            | 4980       | 3935  |
| (3, 25, C, 8)  | -          | 36  | 59    | 32    | 4   | 0.449    | -                    | -            | 5735       | 4414  |
| (3, 50, A, 2)  | 1.033      | 99  | 0     | 17    | 5   | 3.739    | 3.727                | 6769         | 6995       | 6769  |
| (3, 50, A, 5)  | 1.037      | 69  | 0     | 6     | 5   | 2.413    | 2.043                | 11345        | 11764      | 11346 |
| (3, 50, A, 8)  | 1.007      | 117 | 0     | 50    | 8   | 49.004   | 29.269               | 17283        | 17406      | 17283 |
| (3, 50, B, 2)  | 1.011      | 36  | 0     | 1     | 4   | 1.976    | 1.971                | 7549         | 7634       | 7549  |
| (3, 50, B, 5)  | 1.015      | 468 | 0     | 99    | 29  | tl       | 483.842              | 13571        | 13781      | 13573 |
| (3, 50, B, 8)  | 1.011      | 114 | 0     | 33    | 9   | 77.373   | 15.220               | 19680        | 19896      | 19697 |
| (3, 50, C, 2)  | -          | 231 | 37    | 108   | 15  | 934.599  | -                    | -            | 5215       | 3764  |
| (3, 50, C, 5)  | -          | 159 | 64    | 397   | 10  | 211.139  | -                    | -            | 9148       | 7564  |
| (3, 50, C, 8)  | -          | 54  | 88    | 169   | 5   | 0.977    | -                    | -            | 11002      | 9194  |
| (3, 75, A, 2)  | 1.003      | 60  | 0     | 70    | 4   | 9.057    | 1.342                | 14664        | 14711      | 14672 |
| (3, 75, A, 5)  | 1.041      | 45  | 0     | 1     | 3   | 0.842    | 0.827                | 13869        | 14434      | 13869 |
| (3, 75, A, 8)  | 1.002      | 87  | 0     | 286   | 5   | 4.056    | 4.032                | 26468        | 26519      | 26468 |
| (3, 75, B, 2)  | -          | 444 | 0     | 130   | 18  | tl       | -                    | -            | 11508      | 11229 |
| (3, 75, B, 5)  | 1.002      | 81  | 0     | 97    | 4   | 5.206    | 5.180                | 23139        | 23194      | 23139 |
| (3, 75, B, 8)  | 1.011      | 309 | 0     | 51    | 18  | 1143.710 | 540.207              | 30118        | 30438      | 30118 |
| (3, 75, C, 2)  | -          | 357 | 36    | 177   | 15  | tl       | -                    | -            | 7242       | 6568  |
| (3, 75, C, 5)  | -          | 141 | 152   | 654   | 7   | 175.807  | -                    | -            | 13553      | 11175 |
| (3, 75, C, 8)  | -          | 21  | 74    | 128   | 3   | 0.517    | -                    | -            | 16736      | 14235 |
| (3, 100, A, 2) | -          | 333 | 0     | 15    | 15  | tl       | -                    | -            | 15164      | 14825 |
| (3, 100, A, 5) | 1.003      | 408 | 0     | 28    | 21  | tl       | 1330.340             | 32673        | 32766      | 32677 |
| (3, 100, A, 8) | 1.006      | 42  | 0     | 391   | 3   | 1.959    | 1.915                | 37607        | 37826      | 37607 |
| (3, 100, B, 2) | -          | 516 | 0     | 297   | 21  | tl       | -                    | -            | 15946      | 15679 |
| (3, 100, B, 5) | -          | 291 | 0     | 81    | 12  | tl       | -                    | -            | 29393      | 29119 |
| (3, 100, B, 8) | -          | 630 | 0     | 127   | 29  | tl       | -                    | -            | 40282      | 40082 |
| (3, 100, C, 2) | -          | 288 | 45    | 285   | 12  | tl       | -                    | -            | 11222      | 10045 |
| (3, 100, C, 5) | -          | 234 | 226   | 2059  | 10  | tl       | -                    | -            | 18272      | 15941 |
| (3, 100, C, 8) | -          | 30  | 242   | 715   | 3   | 0.932    | -                    | -            | 20653      | 16855 |

**Table 2** Full results for the KPG with  $n = 3$ .

### Full NFG Results

In Table 3, we report the full results for the NFG. In the second and third columns, we report the weights of player 1 and 2 as  $w^1$  and  $w^2$ , respectively. We remark that  $w^3 = 1 - w^1 - w^2$ .

| $( V ,  E )$ | $w^1$ | $w^2$ | $PoS$ | #EI | #It | Time    | Time-1 <sup>st</sup> | $PNE^*$ | $OSW$ | Bound |
|--------------|-------|-------|-------|-----|-----|---------|----------------------|---------|-------|-------|
| (50, 99)     | 0.33  | 0.33  | 1.061 | 5   | 3   | 0.037   | 0.036                | 980     | 924   | 980   |
| (50, 99)     | 0.6   | 0.2   | 1.245 | 8   | 3   | 0.040   | 0.039                | 1150    | 924   | 1150  |
| (50, 99)     | 0.45  | 0.45  | 1.061 | 5   | 3   | 0.034   | 0.034                | 980     | 924   | 980   |
| (100, 206)   | 0.33  | 0.33  | 1.000 | 3   | 2   | 0.047   | 0.041                | 1320    | 1320  | 1320  |
| (100, 206)   | 0.6   | 0.2   | 1.000 | 2   | 2   | 0.046   | 0.040                | 1320    | 1320  | 1320  |
| (100, 206)   | 0.45  | 0.45  | 1.000 | 2   | 2   | 0.047   | 0.040                | 1320    | 1320  | 1320  |
| (150, 308)   | 0.33  | 0.33  | 1.015 | 8   | 4   | 0.996   | 0.222                | 2049    | 2019  | 2042  |
| (150, 308)   | 0.6   | 0.2   | 1.015 | 5   | 4   | 0.354   | 0.353                | 2049    | 2019  | 2049  |
| (150, 308)   | 0.45  | 0.45  | 1.015 | 5   | 3   | 0.565   | 0.190                | 2049    | 2019  | 2041  |
| (200, 416)   | 0.33  | 0.33  | 1.000 | 1   | 2   | 0.109   | 0.096                | 2336    | 2336  | 2336  |
| (200, 416)   | 0.6   | 0.2   | 1.007 | 12  | 5   | 2.828   | 1.696                | 2352    | 2336  | 2346  |
| (200, 416)   | 0.45  | 0.45  | 1.187 | 22  | 10  | 6.908   | 1.529                | 2352    | 2336  | 2349  |
| (250, 517)   | 0.33  | 0.33  | 1.027 | 137 | 37  | 144.392 | 33.653               | 2730    | 2672  | 2729  |
| (250, 517)   | 0.6   | 0.2   | 1.027 | 47  | 17  | 43.991  | 13.430               | 2730    | 2672  | 2729  |
| (250, 517)   | 0.45  | 0.45  | 1.012 | 10  | 5   | 2.111   | 1.122                | 2703    | 2672  | 2693  |
| (300, 626)   | 0.33  | 0.33  | 1.060 | 36  | 10  | 14.877  | 2.068                | 3587    | 3567  | 3587  |
| (300, 626)   | 0.6   | 0.2   | 1.053 | 26  | 11  | 21.300  | 5.701                | 3587    | 3567  | 3585  |
| (300, 626)   | 0.45  | 0.45  | 1.000 | 1   | 2   | 0.161   | 0.140                | 3567    | 3567  | 3567  |
| (350, 730)   | 0.33  | 0.33  | 1.003 | 15  | 5   | 9.664   | 3.100                | 3678    | 3669  | 3677  |
| (350, 730)   | 0.6   | 0.2   | 1.014 | 41  | 11  | 31.889  | 18.997               | 3687    | 3669  | 3687  |
| (350, 730)   | 0.45  | 0.45  | 1.000 | 1   | 2   | 0.197   | 0.173                | 3669    | 3669  | 3669  |
| (400, 822)   | 0.33  | 0.33  | 1.207 | 100 | 29  | 163.047 | 0.228                | 4348    | 4319  | 4347  |
| (400, 822)   | 0.6   | 0.2   | 1.016 | 543 | 116 | tl      | 584.854              | 4387    | 4319  | 4373  |
| (400, 822)   | 0.45  | 0.45  | 1.007 | 103 | 26  | 121.910 | 100.997              | 4348    | 4319  | 4346  |
| (450, 934)   | 0.33  | 0.33  | 1.159 | 0   | 2   | 0.304   | 0.250                | 4827    | 4827  | 4827  |
| (450, 934)   | 0.6   | 0.2   | 1.021 | 575 | 119 | tl      | 7.284                | 4925    | 4827  | 4866  |
| (450, 934)   | 0.45  | 0.45  | 1.159 | 609 | 115 | tl      | 0.281                | 4934    | 4827  | 4864  |
| (500, 1060)  | 0.33  | 0.33  | 1.004 | 66  | 29  | 198.440 | 5.191                | 5535    | 5512  | 5534  |
| (500, 1060)  | 0.6   | 0.2   | 1.004 | 20  | 8   | 20.951  | 11.231               | 5535    | 5512  | 5535  |
| (500, 1060)  | 0.45  | 0.45  | 1.005 | 21  | 12  | 41.808  | 5.321                | 5535    | 5512  | 5534  |

Table 3 Full results for the NFG.

**Full CFLD Results**

We report the results for a set of instances from Crönert and Minner (2022, table 2) (i.e.,  $\beta = 0.5$  and  $d_{max} = 20$ ). We report the full set of our results in Table 4, where, in the second and third columns, we report the budget of player 1 and 2 as  $B^1$  and  $B^2$ . When  $n = 3$ ,  $B^3 = 10$ .

| $n$ | $B^1$ | $B^2$ | $PoS$ | #EI | #It | Time     | Time-1 <sup>st</sup> | $PNE^*$ | $OSW$ | Bound |
|-----|-------|-------|-------|-----|-----|----------|----------------------|---------|-------|-------|
| 2   | 10    | 10    | 1.000 | 2   | 2   | 0.038    | 0.036                | 69      | 69    | 69    |
| 2   | 10    | 20    | 1.000 | 2   | 2   | 0.259    | 0.256                | 109     | 109   | 109   |
| 2   | 10    | 30    | 1.000 | 2   | 2   | 0.871    | 0.869                | 153     | 153   | 153   |
| 2   | 10    | 40    | 1.000 | 2   | 2   | 1.026    | 1.025                | 186     | 186   | 186   |
| 2   | 10    | 50    | 1.000 | 2   | 2   | 0.545    | 0.544                | 212     | 212   | 212   |
| 2   | 10    | 60    | 1.000 | 2   | 2   | 0.627    | 0.626                | 232     | 232   | 232   |
| 2   | 10    | 70    | 1.013 | 4   | 3   | 2.081    | 2.079                | 236     | 239   | 236   |
| 2   | 10    | 80    | 1.047 | 8   | 4   | 4.908    | 4.905                | 236     | 247   | 236   |
| 2   | 10    | 90    | 1.029 | 8   | 4   | 3.532    | 3.529                | 245     | 252   | 245   |
| 2   | 10    | 100   | 1.028 | 8   | 4   | 3.706    | 3.701                | 247     | 254   | 247   |
| 2   | 20    | 20    | 1.000 | 2   | 2   | 0.426    | 0.424                | 136     | 136   | 136   |
| 2   | 20    | 30    | 1.000 | 2   | 2   | 1.153    | 1.151                | 180     | 180   | 180   |
| 2   | 20    | 40    | 1.000 | 2   | 2   | 0.867    | 0.865                | 210     | 210   | 210   |
| 2   | 20    | 50    | 1.000 | 4   | 3   | 1.760    | 1.758                | 232     | 232   | 232   |
| 2   | 20    | 60    | 1.013 | 10  | 5   | 11.852   | 6.770                | 236     | 239   | 238   |
| 2   | 20    | 70    | 1.038 | 6   | 3   | 7.494    | 7.194                | 234     | 243   | 234   |
| 2   | 20    | 80    | -     | 6   | 4   | 9.530    | -                    | -       | 252   | 243   |
| 2   | 20    | 90    | -     | 8   | 4   | 14.304   | -                    | -       | 254   | 247   |
| 2   | 20    | 100   | -     | 6   | 3   | 19.163   | -                    | -       | 254   | 252   |
| 2   | 30    | 30    | 1.000 | 2   | 2   | 2.583    | 2.580                | 202     | 202   | 202   |
| 2   | 30    | 40    | 1.000 | 2   | 2   | 1.852    | 1.849                | 232     | 232   | 232   |
| 2   | 30    | 50    | 1.030 | 14  | 5   | 13.268   | 6.067                | 236     | 243   | 238   |
| 2   | 30    | 60    | 1.065 | 14  | 7   | 37.077   | 37.067               | 232     | 247   | 232   |
| 2   | 30    | 70    | 1.050 | 8   | 4   | 38.741   | 38.384               | 240     | 252   | 240   |
| 2   | 30    | 80    | 1.058 | 16  | 5   | 515.179  | 270.395              | 240     | 254   | 241   |
| 2   | 30    | 90    | -     | 10  | 6   | 1327.610 | -                    | -       | 254   | 240   |
| 2   | 30    | 100   | -     | 8   | 5   | 778.459  | -                    | -       | 254   | 247   |
| 2   | 40    | 40    | 1.138 | 24  | 9   | 491.695  | 154.949              | 210     | 239   | 216   |
| 2   | 40    | 50    | 1.038 | 16  | 6   | 128.764  | 23.469               | 238     | 247   | 240   |
| 2   | 40    | 60    | 1.050 | 18  | 9   | 344.539  | 98.475               | 240     | 252   | 240   |
| 2   | 40    | 70    | 1.058 | 14  | 6   | 808.094  | 418.576              | 240     | 254   | 245   |
| 2   | 40    | 80    | 1.058 | 10  | 5   | 1636.910 | 779.146              | 240     | 254   | 243   |
| 3   | 10    | 10    | 1.072 | 6   | 3   | 0.360    | 0.358                | 69      | 74    | 69    |
| 3   | 10    | 20    | 1.000 | 3   | 2   | 0.180    | 0.178                | 136     | 136   | 136   |
| 3   | 10    | 30    | 1.000 | 3   | 2   | 0.522    | 0.518                | 180     | 180   | 180   |
| 3   | 10    | 40    | 1.000 | 3   | 2   | 0.494    | 0.492                | 210     | 210   | 210   |
| 3   | 10    | 50    | 1.000 | 3   | 2   | 0.631    | 0.628                | 232     | 232   | 232   |
| 3   | 10    | 60    | 1.022 | 9   | 3   | 2.037    | 1.978                | 232     | 237   | 232   |
| 3   | 10    | 70    | 1.030 | 9   | 4   | 4.772    | 4.769                | 236     | 243   | 236   |
| 3   | 10    | 80    | 1.029 | 9   | 4   | 3.437    | 3.433                | 245     | 252   | 245   |
| 3   | 10    | 90    | 1.037 | 9   | 4   | 6.679    | 6.676                | 245     | 254   | 245   |
| 3   | 10    | 100   | -     | 9   | 4   | 16.522   | -                    | -       | 254   | 249   |
| 3   | 20    | 20    | 1.000 | 3   | 2   | 1.520    | 1.517                | 158     | 158   | 158   |
| 3   | 20    | 30    | 1.037 | 18  | 4   | 6.161    | 5.795                | 187     | 194   | 187   |
| 3   | 20    | 40    | 1.032 | 9   | 3   | 3.088    | 3.018                | 217     | 224   | 217   |
| 3   | 20    | 50    | 1.000 | 3   | 2   | 1.931    | 1.929                | 239     | 239   | 239   |
| 3   | 20    | 60    | 1.030 | 15  | 5   | 19.666   | 19.662               | 236     | 243   | 236   |
| 3   | 20    | 70    | 1.068 | 6   | 3   | 5.114    | 5.111                | 236     | 252   | 236   |

|   |    |     |       |    |   |          |          |     |     |     |
|---|----|-----|-------|----|---|----------|----------|-----|-----|-----|
| 3 | 20 | 80  | 1.058 | 9  | 4 | 14.024   | 14.021   | 240 | 254 | 240 |
| 3 | 20 | 90  | -     | 9  | 3 | 35.657   | -        | -   | 254 | 252 |
| 3 | 20 | 100 | -     | 9  | 4 | 162.306  | -        | -   | 254 | 252 |
| 3 | 30 | 30  | 1.000 | 18 | 4 | 11.841   | 11.838   | 216 | 216 | 216 |
| 3 | 30 | 40  | 1.102 | 27 | 8 | 54.111   | 35.612   | 216 | 238 | 218 |
| 3 | 30 | 50  | 1.038 | 24 | 8 | 51.141   | 51.135   | 238 | 247 | 238 |
| 3 | 30 | 60  | 1.050 | 18 | 6 | 109.115  | 109.110  | 240 | 252 | 240 |
| 3 | 30 | 70  | 1.058 | 24 | 8 | 226.185  | 226.180  | 240 | 254 | 240 |
| 3 | 30 | 80  | 1.058 | 15 | 5 | 833.079  | 434.912  | 240 | 254 | 247 |
| 3 | 30 | 90  | -     | 9  | 3 | 1153.500 | -        | -   | 254 | 254 |
| 3 | 30 | 100 | 1.058 | 12 | 5 | tl       | 3021.700 | 240 | 254 | 243 |
| 3 | 40 | 40  | 1.038 | 36 | 8 | 222.003  | 221.639  | 238 | 247 | 238 |
| 3 | 40 | 50  | 1.050 | 27 | 8 | 207.155  | 206.729  | 240 | 252 | 240 |
| 3 | 40 | 60  | 1.076 | 24 | 9 | 2848.410 | 1696.300 | 236 | 254 | 244 |
| 3 | 40 | 70  | 1.058 | 24 | 8 | 2441.450 | 833.853  | 240 | 254 | 240 |
| 3 | 40 | 80  | -     | 15 | 6 | tl       | -        | -   | 254 | 252 |

Table 4: Full results for the *CFLD* from the instances of Crönert and Minner (2022, Table 2).

### Full *qIPGs* Results

We report the full results for the instances of Schwarze and Stein (2022) in Table 5, and the ones generated following the scheme of Sagratella (2016) in Table 6. In the latter table, we refer to Sagratella (2016) for an overview on the instances acronyms.

| Instance | #EQs | PoS     | PoA     | #EI | #It | Time    | Time-1 <sup>st</sup> | PNE *     | PNE °     | OSW       | Bound    |
|----------|------|---------|---------|-----|-----|---------|----------------------|-----------|-----------|-----------|----------|
| C22.3    | 2    | 1.0815  | 1.1238  | 14  | 4   | 0.3692  | 0.2835               | -22.7030  | -21.8475  | -24.5524  | -22.7030 |
| C22.2    | 1    | 1.0000  | 1.0000  | 2   | 2   | 0.0949  | 0.0811               | -0.3146   | -0.3146   | -0.3146   | -0.3146  |
| C22.1    | 2    | 1.4233  | 2.1559  | 24  | 6   | 0.6366  | 0.1852               | -13.5053  | -8.9158   | -19.2216  | 0.0196   |
| C22.4    | 0    | -       | -       | 16  | 3   | 0.3097  | -                    | -         | -         | -15.1462  | -6.8359  |
| C23.1    | 2    | 1.0353  | 1.6333  | 28  | 5   | 0.7040  | 0.2652               | -10.7928  | -6.8413   | -11.1737  | 0.0000   |
| C23.3    | 2    | 1.4506  | 3.0534  | 24  | 7   | 1.0306  | 0.5635               | -22.3566  | -10.6215  | -32.4315  | -10.6215 |
| C23.2    | 0    | -       | -       | 26  | 6   | 1.0065  | -                    | -         | -         | -22.3275  | -0.3407  |
| C23.6    | 1    | 23.2815 | 23.2815 | 16  | 4   | 0.7469  | 0.6326               | -0.3396   | -0.3396   | -7.9063   | -0.3572  |
| C23.7    | 1    | 1.0101  | 1.0101  | 6   | 3   | 0.4038  | 0.2817               | -4.5242   | -4.5242   | -4.5698   | -4.5242  |
| C23.5    | 0    | -       | -       | 20  | 6   | 1.0198  | -                    | -         | -         | -8.2644   | -0.2266  |
| C23.4    | 0    | -       | -       | 26  | 6   | 0.9098  | -                    | -         | -         | -44.4346  | -4.6428  |
| C23.8    | 2    | 1.0153  | 1.5113  | 68  | 13  | 3.2209  | 0.3646               | -74.4543  | -50.0193  | -75.5936  | -3.5526  |
| C24.4    | 0    | -       | -       | 32  | 5   | 4.6024  | -                    | -         | -         | -46.2197  | -1.3690  |
| C24.3    | 0    | -       | -       | 48  | 7   | 4.2759  | -                    | -         | -         | -49.3061  | -2.2944  |
| C24.2    | 0    | -       | -       | 40  | 5   | 2.8302  | -                    | -         | -         | -50.0571  | -1.5728  |
| C24.1    | 1    | 1.3206  | 1.3206  | 20  | 3   | 1.8845  | 1.1885               | -6.4656   | -6.4656   | -8.5384   | -6.4825  |
| C25.4    | 1    | 1.4166  | 1.4166  | 34  | 7   | 34.4549 | 4.6820               | -50.3544  | -50.3544  | -71.3315  | -5.5704  |
| C25.1    | 3    | 1.2068  | 11.3913 | 64  | 10  | 32.8601 | 3.6125               | -22.4829  | -2.3818   | -27.1321  | -2.3818  |
| C25.3    | 1    | 2.0289  | 2.0289  | 60  | 10  | 26.9686 | 4.6411               | -45.6431  | -45.6431  | -92.6057  | -8.0414  |
| C25.2    | 1    | 4.1130  | 4.1130  | 66  | 12  | 49.2170 | 17.9271              | -10.2162  | -10.2162  | -42.0192  | -2.1366  |
| C32.1    | 2    | 3.1976  | 6.0787  | 30  | 4   | 0.7915  | 0.6078               | -21.6314  | -11.3788  | -69.1684  | -21.6314 |
| C32.2    | 1    | 1.1101  | 1.1101  | 15  | 5   | 1.1502  | 0.4799               | -28.0541  | -28.0541  | -31.1421  | -9.9981  |
| C32.3    | 3    | 1.1778  | -       | 63  | 9   | 2.2256  | 0.8736               | -45.5016  | 0.0000    | -53.5937  | -14.9792 |
| C32.4    | 0    | -       | -       | 60  | 4   | 0.6875  | -                    | -         | -         | -30.6557  | -8.8992  |
| C33.2    | 1    | 8.3676  | 8.3676  | 117 | 12  | 23.1855 | 15.4598              | -9.2113   | -9.2113   | -77.0768  | -3.7804  |
| C33.3    | 1    | 1.7099  | 1.7099  | 102 | 10  | 25.2901 | 1.6631               | -57.6349  | -57.6349  | -98.5491  | -1.3043  |
| C33.1    | 1    | 1.2914  | 1.2914  | 129 | 17  | 55.9786 | 4.1433               | -138.1190 | -138.1190 | -178.3720 | -6.0334  |
| C33.4    | 0    | -       | -       | 87  | 9   | 38.0066 | -                    | -         | -         | -118.7970 | -6.0558  |
| NC22.1   | 2    | 2.2947  | 2.2947  | 18  | 4   | 0.4126  | 0.1822               | -8.7456   | -8.7456   | -20.0687  | -8.7456  |
| NC22.2   | 1    | 1.9081  | 1.9081  | 14  | 4   | 0.4483  | 0.3664               | -12.2614  | -12.2614  | -23.3957  | -12.2614 |
| NC22.3   | 1    | 2.3939  | 2.3939  | 16  | 5   | 0.4243  | 0.3463               | -22.1224  | -22.1224  | -52.9584  | -22.1224 |

---

|        |   |        |        |    |   |         |        |           |           |           |           |
|--------|---|--------|--------|----|---|---------|--------|-----------|-----------|-----------|-----------|
| NC22_4 | 0 | -      | -      | 16 | 4 | 0.4330  | -      | -         | -         | -34.0944  | -22.9080  |
| NC23_8 | 0 | -      | -      | 18 | 5 | 0.8855  | -      | -         | -         | -57.4117  | -31.8276  |
| NC23_2 | 1 | 1.4346 | 1.4346 | 10 | 4 | 1.0951  | 0.2406 | -29.1437  | -29.1437  | -41.8083  | -15.2740  |
| NC23_3 | 0 | -      | -      | 20 | 4 | 0.7570  | -      | -         | -         | -79.2272  | -28.3022  |
| NC23_1 | 1 | 1.6194 | 1.6194 | 36 | 8 | 1.5463  | 0.6476 | -61.1489  | -61.1489  | -99.0215  | -2.1164   |
| NC23_4 | 3 | 1.1508 | 1.9143 | 32 | 9 | 1.4491  | 0.3539 | -74.7629  | -44.9448  | -86.0367  | -35.2390  |
| NC23_5 | 2 | 1.0962 | 1.7415 | 10 | 4 | 0.9394  | 0.3543 | -86.4907  | -54.4442  | -94.8133  | -54.4442  |
| NC23_7 | 0 | -      | -      | 24 | 4 | 1.0328  | -      | -         | -         | -46.1839  | -14.7437  |
| NC23_6 | 0 | -      | -      | 12 | 3 | 0.8541  | -      | -         | -         | -39.4816  | -29.1236  |
| NC24_4 | 0 | -      | -      | 34 | 5 | 2.0809  | -      | -         | -         | -71.6710  | -62.7970  |
| NC24_1 | 1 | 1.0190 | 1.0190 | 16 | 4 | 1.4601  | 0.8236 | -128.9180 | -128.9180 | -131.3660 | -98.6356  |
| NC24_2 | 0 | -      | -      | 10 | 3 | 1.0317  | -      | -         | -         | -59.2505  | -50.3392  |
| NC24_3 | 0 | -      | -      | 18 | 4 | 1.4827  | -      | -         | -         | -81.1047  | -62.3756  |
| NC25_4 | 1 | 1.4370 | 1.4370 | 14 | 6 | 3.9086  | 2.9218 | -116.9060 | -116.9060 | -167.9990 | -116.9060 |
| NC25_2 | 2 | 1.0487 | 1.1744 | 30 | 8 | 7.1719  | 0.9324 | -183.7380 | -164.0840 | -192.6940 | -72.1818  |
| NC25_3 | 2 | 1.4358 | 1.9921 | 32 | 8 | 25.6082 | 3.2763 | -121.5220 | -87.5895  | -174.4870 | -87.5895  |
| NC25_1 | 0 | -      | -      | 38 | 6 | 19.4117 | -      | -         | -         | -163.5600 | -62.2675  |
| NC32_3 | 2 | 1.0000 | 1.4850 | 24 | 5 | 1.2589  | 0.4827 | -101.4570 | -68.3218  | -101.4570 | 2.6985    |
| NC32_2 | 2 | 1.0652 | 1.4657 | 15 | 4 | 0.5213  | 0.2782 | -43.2125  | -31.4043  | -46.0281  | -31.4043  |
| NC32_1 | 0 | -      | -      | 36 | 4 | 0.7526  | -      | -         | -         | -66.5208  | -21.4082  |
| NC32_4 | 4 | 1.0145 | 1.8493 | 45 | 9 | 1.5802  | 0.3484 | -77.9484  | -42.7617  | -79.0771  | -20.4243  |
| NC33_1 | 2 | 1.0042 | 1.0451 | 33 | 6 | 6.7043  | 1.3057 | -184.7260 | -177.4950 | -185.4930 | -99.5192  |
| NC33_3 | 0 | -      | -      | 42 | 7 | 4.3455  | -      | -         | -         | -104.1130 | -21.0555  |
| NC33_2 | 1 | 1.3586 | 1.3586 | 54 | 6 | 6.8289  | 3.3613 | -90.6533  | -90.6533  | -123.1600 | -71.4323  |
| NC33_4 | 1 | 1.9431 | 1.9431 | 57 | 8 | 6.5654  | 2.6089 | -120.5760 | -120.5760 | -234.2880 | -41.7204  |

---

Table 5: Full results for the *qIPG* from the instances of [Schwarze and Stein \(2022\)](#).

| Instance | #EQs | #EI | #It | Time   | Time-1 <sup>st</sup> | <i>PNE</i> * | <i>PNE</i> ° | <i>OSW</i> |
|----------|------|-----|-----|--------|----------------------|--------------|--------------|------------|
| 2-1-A-H  | 3    | 110 | 24  | 0.889  | 0.057                | -74.0        | 0.0          | -2128000.0 |
| 2-1-B-H  | 2    | 102 | 16  | 0.581  | 0.158                | -8.5         | 0.0          | -8500000.0 |
| 2-1-A-L  | 5    | 188 | 30  | 2.171  | 0.175                | -74.0        | 0.0          | -4376000.0 |
| 2-1-B-L  | 2    | 136 | 23  | 0.743  | 0.100                | -27.5        | -0.5         | -6477570.0 |
| 2-2-A-H  | 7    | 50  | 12  | 1.769  | 0.148                | -425.5       | 0.0          | -1438.0    |
| 2-2-B-H  | 8    | 166 | 23  | 11.707 | 4.969                | -924.5       | -0.5         | -2712.0    |
| 2-2-A-L  | 1    | 16  | 3   | 0.327  | 0.247                | 0.0          | 0.0          | -124.0     |
| 2-2-B-L  | 7    | 112 | 19  | 6.500  | 0.205                | -7289.5      | 0.0          | -8560.0    |
| 2-3-A-H  | 4    | 20  | 6   | 0.458  | 0.140                | -283.0       | 0.0          | -1118.0    |
| 2-3-B-H  | 3    | 54  | 8   | 0.989  | 0.475                | -25.5        | 0.0          | -3138.0    |
| 2-3-A-L  | 1    | 8   | 3   | 0.179  | 0.137                | 0.0          | 0.0          | -270.0     |
| 2-3-B-L  | 1    | 14  | 3   | 0.250  | 0.188                | 0.0          | 0.0          | -750.5     |
| 3-1-A-H  | 6    | 228 | 25  | 5.137  | 0.964                | -4776.0      | 0.0          | -76091.5   |
| 3-1-B-H  | 8    | 246 | 31  | 4.465  | 0.647                | -957.0       | 0.0          | -234695.0  |
| 3-1-A-L  | 3    | 159 | 18  | 3.220  | 1.273                | -618.5       | 0.0          | -93872.0   |
| 3-1-B-L  | 1    | 105 | 12  | 1.204  | 0.392                | 0.0          | 0.0          | -71595.0   |
| 3-2-A-H  | 1    | 33  | 5   | 0.760  | 0.395                | 0.0          | 0.0          | -1962.5    |
| 3-2-B-H  | 1    | 15  | 3   | 0.078  | 0.069                | 0.0          | 0.0          | -1080.0    |
| 3-2-A-L  | 8    | 84  | 11  | 3.390  | 0.629                | -1558.0      | 0.0          | -3032.5    |
| 3-2-B-L  | 4    | 51  | 8   | 1.269  | 0.447                | -125.0       | 0.0          | -2044.0    |
| 4-1-A-H  | 4    | 76  | 7   | 2.140  | 1.077                | -249.0       | 0.0          | -552.5     |
| 4-1-B-H  | 13   | 152 | 16  | 4.654  | 1.689                | -3603.0      | 0.0          | -6115.5    |
| 4-1-A-L  | 13   | 116 | 10  | 5.927  | 0.869                | -1462.0      | 0.0          | -1804.0    |
| 4-1-B-L  | 11   | 132 | 12  | 2.863  | 0.238                | -1677.5      | 0.0          | -5817.5    |
| 6-1-A-H  | 3    | 66  | 5   | 0.595  | 0.425                | -36.5        | 0.0          | -1437.5    |
| 6-1-B-H  | 2    | 54  | 6   | 0.457  | 0.302                | -17.0        | 0.0          | -1715.0    |
| 6-1-A-L  | 3    | 60  | 5   | 0.711  | 0.192                | -440.0       | 0.0          | -2795.0    |
| 6-1-B-L  | 6    | 138 | 8   | 2.059  | 0.602                | -363.5       | 0.0          | -10510.0   |

**Table 6** Full results for the qIPG from the instances of [Sagratella \(2016\)](#).

## References

- Caprara A, Carvalho M, Lodi A, Woeginger GJ (2014) A Study on the Computational Complexity of the Bilevel Knapsack Problem. *SIAM Journal on Optimization* 24(2):823–838, ISSN 1052-6234, 1095-7189, URL <http://dx.doi.org/10.1137/130906593>.
- Crönert T, Minner S (2022) Equilibrium Identification and Selection in Finite Games. *Operations Research* ISSN 0030-364X, 1526-5463, URL <http://dx.doi.org/10.1287/opre.2022.2413>.
- Sagratella S (2016) Computing All Solutions of Nash Equilibrium Problems with Discrete Strategy Sets. *SIAM Journal on Optimization* 26(4):2190–2218, ISSN 1052-6234, 1095-7189, URL <http://dx.doi.org/10.1137/15M1052445>.

Schwarze S, Stein O (2022) A branch-and-prune algorithm for discrete Nash equilibrium problems. *Optimization Online* Preprint ID 2022-03-8836:27, URL [http://www.optimization-online.org/DB\\_FILE/2022/03/8836.pdf](http://www.optimization-online.org/DB_FILE/2022/03/8836.pdf).
